# Supplementary material for: Electrochromic devices based on soluble and processable dioxythiophene polymersElectronic supplementary information (ESI) available: details of the synthesis of PProDOT(CH2OC18H37)2 and PProDOT(CH2OEtHx)2 and their polymerization. See http://www.rsc.org/suppdata/jm/b3/b306365h/
Source: Royal Society of Chemistry journal article supplement (doi:10.1039/b306365h), 2003-01-01
Supplement: b306365h.doc [file b306365h.doc]

***Supporting Information***

***Cirpan, Argun, Grenier, Reeves, and Reynolds***

**Synthesis of PProDOT(CH2OC18H37)2 and PProDOT(CH2OEtHx)2**

**Monomer Synthesis:**

3,4-Dimethoxythiophene was condensed with 2,2-bis(bromomethyl)-1,3-propanediol using a modified transetherification method[[1]](#endnote-2) reported by Meijer[[2]](#endnote-3) *et. al.* to form 3,3-Bis(bromomethyl)-3,4-dihydro-*2H*-thieno[3,4-*b*][1,4]dioxepine (ProDOT-(CH2Br)2), as white crystalline solid. ProDOT-(CH2Br)2 was subjected to Williamson etherification by adding it to an *N,N*-dimethylformamide solution of three equivalents of either octadecanol or 2-ethylhexanol and six equivalents of sodium hydride. The mixture was heated at 110 C for 24 hours under argon. After cooling the reaction mixture, water was added to quench excess sodium hydride and subsequently, the aqueous mixture was extracted with ethyl ether. The ether was removed by rotary evaporation and the resulting orange solid was purified by column chromatography (3:2 hexanes, methylene chloride).The products were brominated in the 2 and 5 position of the thiophene ring using NBS following a published procedureError: Reference source not foundto afford the monomers 6,8-dibromo-3,3-Bis-octadecyloxymethyl-3,4-dihydro-*2H*-thieno[3,4-*b*][1,4]dioxepine (ProDOT(CH2OC18H37)2Br2) and 6,8-Dibromo-3,3-bis-(2-ethyl-hexyloxymethyl)-3,4-dihydro-2H-thieno[3,4-b][1,4]dioxepine (ProDOT(CH2OEtHex)2Br2).

**ProDOT(CH2OC18H37)2Br2:** white crystals, mp 65-66 C. 1H NMR (300 MHz, CDCl3) δ 4.07 (s, 4H), 3.46 (s, 4H), 3.38 (t, 4H, *J*= 6.6 Hz), 1.50 (m, 4H), 1.25 (m, 64H), 0.87 (t, 6H, *J*=6.9). HRMS calculated for C45H82O4SBr2: 876.4301 Found: 876.4305.

**ProDOT(CH2OEtHex)2Br2:** clear oil,1H NMR (300MHz, CDCl3)  4.09 (s, 4H), 3.49 (s, 4H), 3.28 (d, 4H), 1.2-1.6 (m, 18H), 0.8-1.0 (m, 12H). HRMS Calcd for C25H42O4SBr2 596.1171. Found 596.1161.

**Polymer Synthesis:**

The polymerizations of the monomers were carried out using Grignard metathesis[[3]](#endnote-4) and the resulting dark purple solids were fractionated by soxhlet extraction (methanol for 24 hrs followed by hexanes for 48 hrs).Error: Reference source not found The polymer was dissolved from the soxhlet thimble by refluxing methylene chloride for 10 hrs. After removal of the methylene chloride by rotary evaporation, the pure polymers was obtained as a golden metallic films.

**Poly(3,3-bis-octadecyloxymethyl-3,4-dihydro-*2H*-thieno[3,4-*b*][1,4]**

**dioxepine ) [PProDOT(CH2OC18H37)2]:** 1H NMR (300 MHz, *d*6-benzene) δ 4.30 (bs, 4H), 3.58 (bs, 4 H), 3.35 (bs, 4H), 1.67 (m, 4H), 1.40 (m, 64H), 0.96 (m, 6H); GPC analysis vs. polystyrene: *Mn*= 14,876, *Mw*= 27,673, PDI=1.86.

**Poly(6,8-Dibromo-3,3-bis-(2-ethyl-hexyloxymethyl)-3,4-dihydro-2H-thieno[3,4-b][1,4]dioxepine) [PProDOT(CH2OEtHx)2]:** 1H NMR (300 MHz, *d*6-benzene) δ 4.25 (s, 4H), 3.58 (s, 4H), 3.26, (s, 4H), 1.6-1.2 (m, 18H), 1.0 (m, 12H). GPC analysis vs. polystyrene: *Mn*= 21,408, *Mw*=36,836, PDI=1.72.

**Instrumentation:**

GPC was performed on two 300 x 7.5 mm Polymer Laboratories PLGel 5 M mixed-C columns with a Waters Associates liquid chromatography 757 UV absorbance detector at 585 nm. Polymer solutions were prepared in THF and filtered through a 50 M filter before injection. A constant flow rate of 1 mL/min was used. NMR spectra were record on a Gemini 300 FT-NMR. Mass spectrometry was carried out on a Finnigan MAT 95Q mass spectrometer.

1. Welsh, D. M.; Kloeppner, L. J.; Madrigal, L.; Pinto, M. R.; Thompson, B. C.; Schanze, K. S.; Abboud, K. A.; Powell, D.; Reynolds, J. R. *Macromolecules*, **2002**, *35*, 6517. [↑](#endnote-ref-2)
2. a) Goldoni, F.; Langeveld-Voss, B. M. W.; Meijer, E. W. *Synth Commun* **1998**, *28*, 2237 b). Langeveld-Voss, B. M. W.;. Janssen, R. A. J.; Christiaans, M. P. T.;. Meskers, S. C. J.; Dekkers, H. P. J. M.; Meijer*,* E. W. *J. Am. Chem. Soc.* **1996**, *118*, 4908. [↑](#endnote-ref-3)
3. a.) Loewe, R. S.; Khersonsky, S. M.; McCullough, R. D. *Adv. Mater*. **1999**, *11*, 250

   b.) Loewe, R. S.; Ewbank, P. C.; Liu, J.; McCullough, R. D. *Macromolecules* **2001**, *34*, 4324 [↑](#endnote-ref-4)
